# Supplementary material for: Network Pharmacology-Based Analysis of the Pharmacological Mechanisms of Aloperine on Cardiovascular Disease
Source: Evid Based Complement Alternat Med. 2020 Jul 14;2020:5180716. doi: 10.1155/2020/5180716 (PMC7376400; doi:10.1155/2020/5180716)
Supplement: Supplementary Materials — Known targets of aloperine and known therapeutic targets acting on CVD. [file 5180716.f1.xlsx]

## Sheet: Sheet1
Title: Network pharmacology-based analysis of the pharmacological mechanisms of aloperine on cardiovascular disease Authors: Bingwu Huang et al.
Known targets of aloperine					Known therapeutic targets acting on CVD
Target					OMIM	Drugbank
SLC6A2					RAI	PTGS1
OPRL1					HEY2	PPARG
HTR2C					HSPB7	PTGS2
MAOA					MFS	FFAR1
MAOB					DGS	FADS1
HTR2B					WBS	SLC8A1
HTR1A					FBN1	ACSL4
HTR2A					NF1	PPARD
HTR6					CRP	TRPV1
PRCP					PXE	ACSL3
ADRA2B					ACE	ACE
ADRA1D					CYP2C19	GABRA1
ADRA1A					APOE	GABRA2
ADRA1B					HOS	GABRA3
HTR5A					HALP1	GABRA4
LSS					IL18	GABRA5
HTR1B					HP	GABRA6
HRH1					GATA6	GABRB1
PNMT					CMH1	GABRB2
RET					PON1	GABRB3
HTR1D					ESR1	GABRD
ADRB1					TBX1	GABRE
HTR1E					IL6	GABRG1
HTR7					ABCA1	GABRG2
NISCH					CSTLO	GABRG3
BCHE					KDR	GABRP
RCOR1 KDM1A					PPARG	GABRQ
DPP4					HMGCR	ADRA2B
TAAR1					CITED2	CHRM1
MPO					UCP2	CHRNA2
ADRA2A					ECTOL1	P2RY12
ADRA2C					IGHD1A	NR3C1
NOS1					SGS	ESR1
FDFT1					NOTCH1	CHRM2
CHRNA4 CHRNB2					BCAR1	NR1I2
ESR2					GACI1	HMGCR
PTK2B					FABP2	ADRB1
HRH3					PTEN	ADRB2
HRH2					APOA1	ADRB3
DRD1					AAAS	HTR2C
CYP2D6					ADM	SLC6A4
MC5R					HABP2	GLRA1
HTR3A					NIDDM	SLC6A2
SRD5A1					WFS1	PLA2G2A
SRD5A2					MELAS	NOS2
PRNP					FTHS	NOS3
DRD5					CMD1DD	MAPK14
CYP3A4					GACI2	MAPK12
ADORA1					ATFB14	MAPK11
ADORA3					TNCY	MAPK13
GRIN2B					ARCL2D	ALOX5AP
SETD7					PUFAQTL1	ADRA1A
CA7					NKX2-5	ADRA1B
CA3					SCN2B	ADRA1D
CA6					ADK	CA1
CA12					ALOX5	CA2
CA14					NCOA3	CA4
CA9					NSD1	SQLE
CA4					APOBR	PRKCB
CA5B					MIR33A	PRKCA
CA5A					VPS54	CSNK2A1
CA13					MYH11	SYK
PDPK1					PTPRB	CA12
CHRM2					TBX20	CA9
CHRM1					ORTHYP1	CA3
DRD3					MMP9	CA5A
L3MBTL3					GOT1	CA5B
CHRNA3 CHRNB4					FOXC1	CA6
SCN4A					MTTL1	CA7
KIF11					GUSB	CA14
HRH4					CTHM	PRKACA
CHRNA7					CX3CR1	PPARA
DPP7					GBA	F2R
PIM1					ACDMPV	CACNA1C
SLC6A4					ITGB1	MME
MALT1					HDLCQ12	NCOA1
FYN					TH
KCNK2					ABCC6
TACR2					PVNH1
ABCB1					NR1H2
CALM1					FADD
TRPV1					ARCL3A
SLC6A3					HFM
DRD2					BDKRB2
PGR					PLXND1
SHBG					EDSSPD1
CYP2C9					HSAN3
AR					ACH
ANPEP					MSPKA
S100B					ALGS2
TNNC1 TNNT2 TNNI3					VSD1
KCNN4					NPHP16
IFNAR1					MCAHS1
CA2					OI18
SQLE					ARHI2
KCNH2					MEOX2
TACR1					LIMK1
GGPS1					SAA1
MGLL					MBL2
OPRD1					CRKL
					ACADS
					RERE
					FBN2
					ARMC4
					NPY1R
					PRKG1
					FADS1
					EDSCV
					COL15A1
					ALDH18A1
					THOP1
					EPHB4
					NLN
					ARMD1
					LPL
					PPARGC1A
					AOVD1
					VEGFA
					CHDS7
					AGTR1
					EFEMP2
					SSKS
					HTR2B
					NR1H3
					RTSC1
					AOMS1
					NR3C1
					ANGPTL3
					ECYT1
					FXS
					HJCYS
					LS
					DFNB68
					HTGTI
					CPPB2
					GPHYSD1
					LDLCQ8
					ATFB5
					PRDX2
					THRA
					ARRB1
					INVS
					LTBP3
					ACADM
					CYBA
					TET2
					TRIM72
					NTF3
					TSTD1
					IFNA1
					SVAS
					COL18A1
					GPX1
					PIK3CG
					CYP19A1
					KIDINS220
					DTGA1
					LDS1
					GDF15
					NIHF
					SMAD6
					ARCL1B
					KLK1
					ADAP2
					ARCL1C
					TGFBR2
					MTHFR
					HTX5
					COL3A1
					CRHR2
					EVC
					NXD
					MCLDS
					ANHD
					CMD1D
					ARMD4
					VSD2
					CILD23
					SSS2
					MC1DN13
					CMH21
					HSD11B1
					UGT1A1
					NPPA
					MMP3
					ADAM10
					EPHB6
					CHD7
					NF1
					MIR33B
					SLC6A2
					IQCE
					INSR
					STWS
					DES
					HBG2
					TFAP2B
					PRKCH
					CELF2
					CMD1V
					FRNS
					MESP1
					FHBL2
					MFN2
					AOVD2
					TBXA2R
					TUBB1
					NS8
					ACE2
					GDF1
					BTHS
					ELN
					FOXC2
					ADM2
					NIDDM1
					MEND
					STL1
					HHF2
					XPB
					VSD3
					LDS5
					PKD1
					GRD1
					FGQTL2
					GPR14
					VLDLR
					NPR1
					THBD
					CMKLR1
					NSD2
					DAND5
					MIR21
					FGD6
					HNRNPA1
					PLEKHA1
					IL4
					ABDS
					EPOR
					IGF2
					NRP1
					WASF2
					SEMA3C
					KLF2
					GATA4
					SELP
					LDS2
					EGFL7
					GSD2
					SOX18
					CBS
					LDS3
					ASIP
					TRNT1
					XLHR
					ISL1
					MAPK7
					MKL2
					LQT1
					AEACEI
					CFC1
					TMAU
					NLSDM
					CORD16
					WITKOS
					CPPB1
					RLS1
					FFS
					GCKR
					HCCS
					CD40
					TYMS
					SPRY1
					HEY1
					CYP17A1
					ARMS2
					CYP21A2
					LEP
					SELENOS
					ICAM1
					SINO
					CFH
					IL11
					NDUFA2
					BRIP1
					LDLR
					UQCRC2
					CCM2
					CHTD6
					ADRB1
					OI1
					PLA2G7
					PCSK9
					IGHD4
					PTGS2
					ANKS6
					AOS1
					TBX2
					MAP3K3
					APELA
					WHS
					MRLS
					HSCR1
					CMD1M
					HDLCQ6
					THCYT3
					CMD1R
					LIDLS1
					MVP1
					CRH
					FOLH1
					CD40LG
					DST
					PDGFB
					NEDD4L
					CHRD
					DBH
					ARID5A
					FOXO3A
					MAS1
					NPHP3
					SCD
					VETD
					FGA
					NOTCH2
					TGFBR1
					SLC2A9
					POU1F1
					MTCO1
					EDN1
					NGPS
					DA9
					PWS
					JAG1
					VAV3
					THAS
					IGF1
					OLR1
					PITA1
					NODAL
					B3GAT3
					HEG1
					AGOTC
					CLS
					LPHDST
					ARH
					AOS2
					HSAN6
					CTRCT16
					NEDBEH
					VVS
					FGF1
					NR3C2
					AR
					CAPNS1
					DYNLL1
					GP1BA
					LIPG
					NEK8
					CHTOP
					SCN1B
					SERPINE1
					ELOVL4
					COL21A1
					MDDGB2
					FGB
					MAPK14
					ESX1L
					FBXW7
					ENPP1
					ATP5F1C
					APOB
					HGPS
					MYHRS
					IL10
					TNFRSF11B
					SLC2A10
					GJA1
					TTN
					OXT
					PTLS
					VCL
					WT1
					ITGB3
					ATORS
					FDH
					MOWS
					SQT1
					RAMSVPS
					HTX6
					CMH9
					SRTD15
					THPH9
					NPPC
					CAV1
					LAMA4
					GHRHR
					PTGIS
					NAT8
					GUCY1B2
					MIR145
					SLC16A9
					KAT6A
					CD36
					RETN
					ALDH2
					PDA1
					FGG
					FABP4
					INS
					HSD17B7
					MTTQ
					IRS1
					AOS5
					HLHS1
					FLT4
					KLF5
					ALGS1
					DRD3
					GTF2I
					TMEM88
					PAFAD
					AGTR2
					ATE1
					PAPPA
					PITA4
					MCOPS1
					MKKS
					B12QTL1
					CHDS6
					OI13
					ARCL2C
					ARHI1
					GAS6
					CD47
					KCNMA1
					HOXA1
					ESS2
					TLL1
					USP16
					OTUD6B
					IFT140
					SEPT8
					PKD2
					UCN3
					ADRB2
					CETP
					MYH7
					KCNJ2
					F2
					EVC2
					UTS2
					PTGIR
					SGBS1
					JDSCD
					CPHD1
					ATFB13
					KCNJ4
					IL6R
					S1PR1
					MIR143
					PTGER1
					PIAS4
					CPS1
					CHRNA3
					NPY
					SDHA
					SST
					TAC4
					EDSVASC
					COL4A1
					SKI
					SCARB1
					GLA
					PNPLA2
